# Supplementary material
Source: publisher figshare collection journal article supplement (https://springernature.figshare.com/ndownloader/files/22432715)
Supplement: Supplementary file 1 [file 22432715]

Measurement(s),ion concentration • concentration of water-soluble element • particulate matter • size distribution • mass concentration of black carbon
Technology Type(s),ion chromatography • inductively coupled plasma mass spectrometry • Micro-Orifice Uniform Deposit Impactors (MOUDI) • Multi-wavelength Absorption Black Carbon Instrument (MABI) • gravimetric analysis
Factor Type(s),geographic location
Sample Characteristic - Location,National Capital Region
